# Supplementary material for: Ubiquitination and regulation of AURKA identifies a hypoxia-independent E3 ligase activity of VHL
Source: PubMed Central journal article supplement — Oncogene. 2017 Jan 23;36(24):3450–63. doi: 10.1038/onc.2016.495 (PMC5485216; doi:10.1038/onc.2016.495), 2017-01-23

Ubiquitination and Regulation of AURKA Identifies a Hypoxia-Independent E3 Ligase Activity of VHL

Elshad Hasanov<sup>1,2</sup>, Guang Chen<sup>1</sup>, Pratim Chowdhury<sup>1,3</sup>, Justin Weldon<sup>1</sup>, Zhiyong Ding<sup>4</sup>, Eric Jonasch<sup>5</sup>, Subrata Sen<sup>6</sup>, Cheryl L. Walker<sup>1,3</sup>, Ruhee Dere<sup>1,3\*</sup>

<sup>1</sup> Center for Translational Cancer Research, Institute of Biosciences and Technology, Texas A&M Health Science Center, Houston, TX, 77030, USA

<sup>2</sup> Department of Basic Oncology, Hacettepe University Cancer Institute, Sıhhiye, Ankara, 06100, Turkey

<sup>3</sup> Center for Precision Environmental Health, Baylor College of Medicine, Houston, TX, 77030, USA

<sup>4</sup> Department of Systems Biology, U.T. M.D. Anderson Cancer Center, Houston, TX, 77030, USA

<sup>5</sup> Department of Genitourinary Medical Oncology, U.T. M.D. Anderson Cancer Center, Houston, TX, 77030, USA

<sup>6</sup> Department of Translational Molecular Pathology, U.T. M.D. Anderson Cancer Center, Houston, TX, 77030, USA

*\*Corresponding Author:* Ruhee Dere, Ph.D., Address: One Baylor Plaza, BCM130, Houston, TX 77030, Tel: 713-798-2183, Email: ruhee.dere@bcm.edu

*Running Title:* Hypoxia-independent ubiquitination of AURKA by VHL

*Financial support:* This work was supported by a Robert A. Welch Endowed Chair in Chemistry (BE-0023) to CLW.

## **SUPPLEMENTARY FIGURE LEGENDS**

### **Supplementary Figure 1. VHL regulates AURKA protein levels**

**(a)** Lysates from A-498 and isogenic VHL<sub>L</sub> (VHL<sub>24</sub>) and VHL<sub>S</sub> (VHL<sub>19</sub>) expressing stable cell lines cultured under confluent and serum starved (for 48h) conditions probed with the indicated antibodies. **(b)** Densitometric quantitation of the ratio of AURKA to GAPDH expression from A-498, A-498 VHL<sub>L</sub> and VHL<sub>S</sub> cells, averaged from 6 independent experiments. \*p<0.05. Error bars denote standard error of the mean (SEM). **(c)** Lysates from hTERT RPE-1 cells overexpressing varying doses of VHL<sub>24</sub> (μg), as denoted, probed for the indicated antibodies.

### **Supplementary Figure 2. VHL interacts with AURKA**

hTERT RPE-1 cells expressing EGFP-AURKA and HA-VHL<sub>30</sub> used in co-immunoprecipitation assays to show binding between HA-VHL<sub>30</sub> and EGFP-AURKA. Pulldown efficiencies are indicated for each immunoprecipitation.

### **Supplementary Figure 3. VHL R167Q mutant fails to ubiquitinate and degrade AURKA**

**(a)** *In vivo* ubiquitination assay using lysates from 786-0 and isogenic 786-0 VHL<sub>24</sub> (WT), and R167Q cell lines grown to confluence and serum starved for 48 hours in the absence of MG132. Ubiquitinated AURKA probed using anti-ubiquitin P4D1 antibody. Arrowhead indicates the expected molecular weight of mono-ubiquitinated AURKA. Input lysates probed with AURKA, VHL and tubulin. **(b)** Graphical representation of

densitometric quantitation (measured from 50-200kD) from the representative experiment shown in (a) denoting a ratio of ubiquitinated AURKA (probed using the P4D1 anti-ubiquitin antibody) to the pull down efficiency (using an anti-AURKA antibody). Black bar (parental 786-0), gray bar (WT), and black bar with white dots (R167Q).

#### **Supplementary Figure 4. VHL regulates AURKA protein half-life and abundance**

*In vivo* ubiquitination assay performed using hTERT RPE-1 cells overexpressing EGFP-AURKA and HA-Ub with and without overexpressed VHL<sub>24</sub> in the absence of MG132. Cells were grown to confluence and harvested following serum withdrawal at the indicated time points. Ubiquitinated AURKA immunoprecipitated using an anti-HA antibody and probed with an anti-AURKA antibody. Input lysates immunoblotted for the indicated antibodies.

#### **Supplementary Figure 5. Rescue of ciliogenesis in VHL-deficient cells with alisertib and rocilinostat**

(a) Graph showing fold change in VHL mRNA transcript levels. (b-c) Lysates from siC and siVHL transfected cells treated with vehicle (DMSO), (b) rocilinostat (ACY1215) or (c) alisertib (MLN8237) probed for the indicated antibodies.

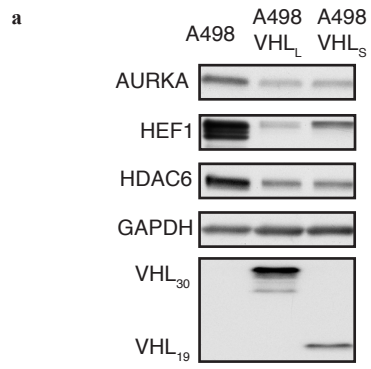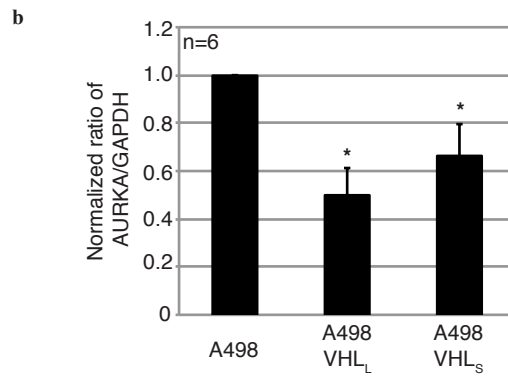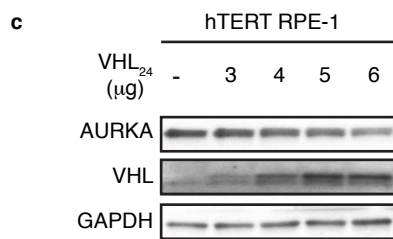

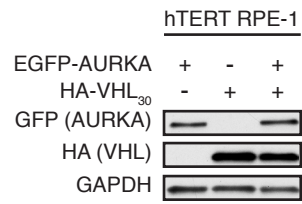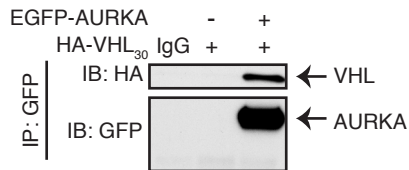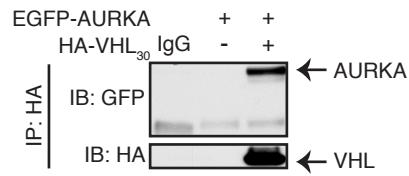

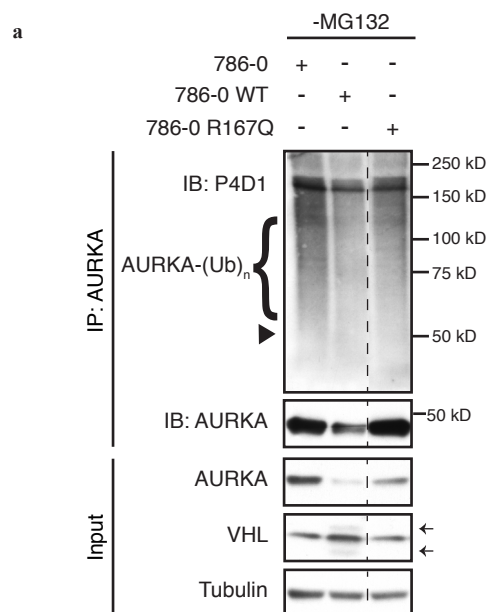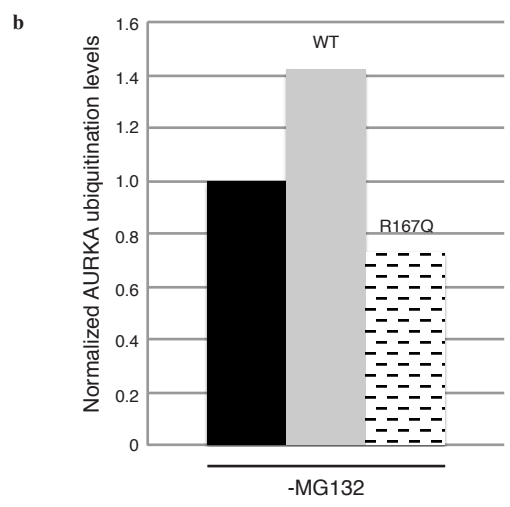

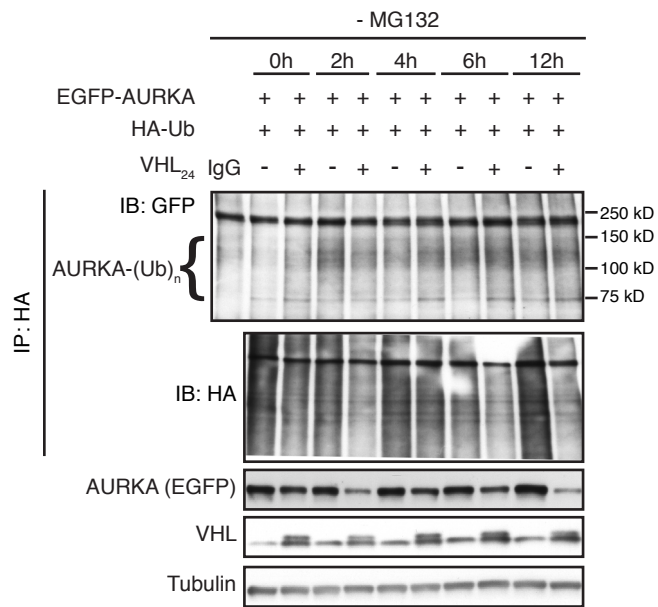



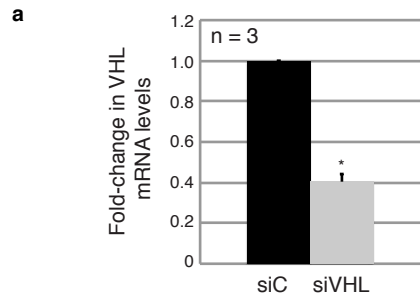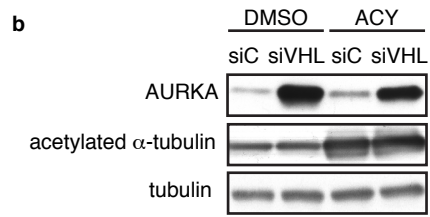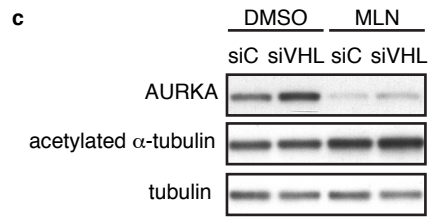

Supplement: onc2016495x1.pdf [file onc2016495x1.pdf]
